# Supplementary figures and images for: Synthesis of lignin-functionalized phenolic nanosphere supported Ag nanoparticles with excellent dispersion stability and catalytic performance
Source: Royal Society of Chemistry journal article supplement (doi:10.1039/c9gc04311j), 2020-01-01

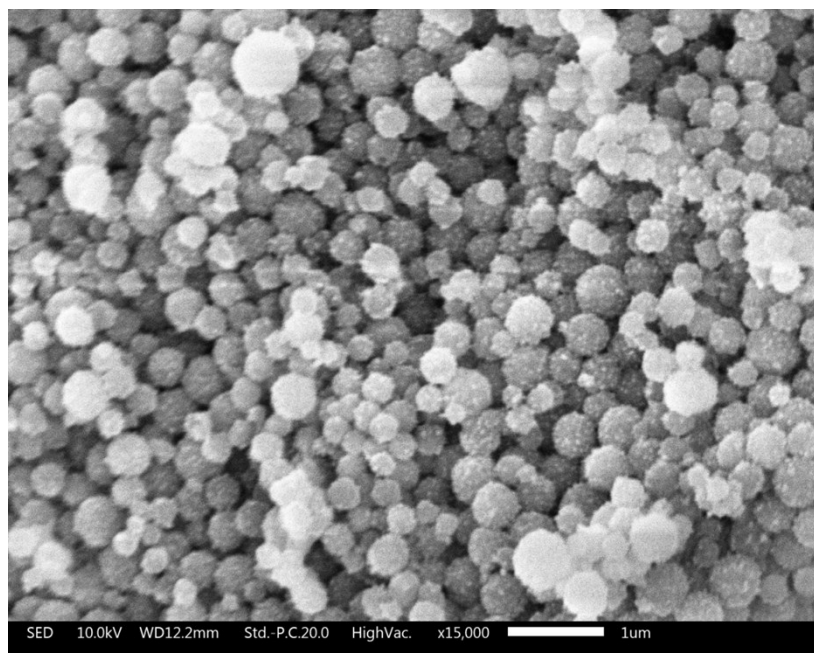

Figure S4 SEM images of LPR@Ag-10 nanocomposites.

Supplement: c9gc04311j1.pdf [file c9gc04311j1.pdf]
